# Supplementary material
Source: Springer Nature journal article supplement (https://www.springermedizin.de/resource/supplementary/13048_2008_6_MOESM3_ESM.pdf/9664704)
Supplement: MOESM3 [file 9664704]

|              |                                                                |     |     |     |     |     |
|--------------|----------------------------------------------------------------|-----|-----|-----|-----|-----|
|              | 10                                                             | 20  | 30  | 40  | 50  | 60  |
| 1 HUMAN      | ATGGCTACTCTGATCTATGTTGATAAGGAAAAGGAGAACAGGCACCCGTTGGTGTGCT     |     |     |     |     | 60  |
| 2 CHIMPANZEE | ATGGCTACTCTGATCTATGTTGATAAGGAAAAGGAGAACAGGCACCCGTTGGTGTGCT     |     |     |     |     | 60  |
| 3 GORILLA    | ATGGCTACTCTGATCTATGTTGATAAGGAAAAGGAGAACAGGCACCCGTTGGTGTGCT     |     |     |     |     | 60  |
| 4 COW        | ATGTCTACTCTGATCTATGTTGATAAGGAAAAGGAGAACAGGCATCCATGTTGGTCTCT    |     |     |     |     | 60  |
| 5 MOUSE      | ATGGCTACTCTATCTTTGTTGATAAGGATAAGGAGAACAGGCACCCGTTGGTGTGCT      |     |     |     |     | 60  |
| 6 RAT        | ATGGCTACTCTGATCTTTGTTGATAAGGATAAGGAGAACAGGCACCCGTTGGTGTGCT     |     |     |     |     | 60  |
| 7Consensus   | ATGGCTACTCTGATCTATGTTGATAAGGAAAAGGAGAACAGGCACCCGTTGGTGTGCT     |     |     |     |     |     |
|              | 70                                                             | 80  | 90  | 100 | 110 | 120 |
| 1 HUMAN      | AAGGATGGGCTGAAGCTGGGGTCTGGACCTTCAATCAAGGCTTAGATGGGAGATCTCAA    |     |     |     |     | 120 |
| 2 CHIMPANZEE | AAGGATGGGCTGAAGCTGGGGTCTGGACCTTCAATCAAGGCTTAGATGGGAGATCTCAA    |     |     |     |     | 120 |
| 3 GORILLA    | AAGGATGGGCTGAAGCTGGGGTCTGGACCTTCAATCAAGGCTTAGATGGGAGATCTCAA    |     |     |     |     | 120 |
| 4 COW        | AAGGATGGGCTGAAGCTGGGGTCTTGGCCTTCAAGTCAAGGCTTAGATGGGAGATCCAG    |     |     |     |     | 120 |
| 5 MOUSE      | AAGGATGGGCTGAAGCTGGGCCTAGT-----GTCAAGGCTTAGATGGGAAAATGTCAG     |     |     |     |     | 114 |
| 6 RAT        | AAGGATGGGCTGAAGCTGGGGTCTGGT-----GTCAAGGCTTAGATGGGAAAATGTCAG    |     |     |     |     | 114 |
| 7Consensus   | AAGGATGGGCTGAAGCTGGGGTCTGGACCTTCAATCAAGGCTTAGATGGGAGATCTCAA    |     |     |     |     |     |
|              | 130                                                            | 140 | 150 | 160 | 170 | 180 |
| 1 HUMAN      | GTTTCAACACCCAGCTTTTGGCAAACGTTGATGCCCCACCAGCCTTACCTAAAGCTACT    |     |     |     |     | 180 |
| 2 CHIMPANZEE | GTTTCAACACCCAGCTTTTGGCAAACGTTGATGCCCCACCAGCCTTACCTAAAGCTACT    |     |     |     |     | 180 |
| 3 GORILLA    | GTTTCAACACCCAGCTTTTGGCAAACGTTGATGCCCCACCAGCCTTACCTAAAGCTACT    |     |     |     |     | 180 |
| 4 COW        | GTTTCAACACCCAGTGTGGCAAATGTTGATGCTCCGCCAGCTTACCAAATAATGCA       |     |     |     |     | 180 |
| 5 MOUSE      | GTTTCAACAGCCTCGAGTCGGCAAAGTGTTCATGCTCC---AGCCGTGCCCTAAAGCCAGC  |     |     |     |     | 171 |
| 6 RAT        | GTTTCAACAGCCAGAGTCGGCAAAGTGTTCGGTCCGCC---AGCCGTGCCCTAAAGCCAGC  |     |     |     |     | 171 |
| 7Consensus   | GTTTCAACACCCAGCTTTTGGCAAACGTTGATGCCCCACCAGCCTTACCTAAAGCTACT    |     |     |     |     |     |
|              | 190                                                            | 200 | 210 | 220 | 230 | 240 |
| 1 HUMAN      | AGAAAAGCTTTGGGAACGTCAACAGAGCTACAGAAAATCTGTAAAGACCAAGGGACCC     |     |     |     |     | 240 |
| 2 CHIMPANZEE | AGAAAAGCTTTGGGAACGTCAACAGAGCTACAGAAAATCTGTAAAGACCAAGGGACCC     |     |     |     |     | 240 |
| 3 GORILLA    | AGAAAAGCTTTGGGAACGTCAACAGAGCTACAGAAAATCTGTAAAGACCAAGGGACCC     |     |     |     |     | 240 |
| 4 COW        | AGAAAAGCTTTGGGAACGTCAACAGAGCTACAGAAAATCTGTAAAGACCAATGGACCC     |     |     |     |     | 240 |
| 5 MOUSE      | AGAAAAGCTTTGGGACAGTCAACAGAGTTCGGGAAAACCTTGAAGACTGGCAAACCC      |     |     |     |     | 231 |
| 6 RAT        | AGAAAAGCTTTGGGAACGTCAACAGAGTTCCTGAAAAGCTTGAAGACTGTAAACCC       |     |     |     |     | 231 |
| 7Consensus   | AGAAAAGCTTTGGGAACGTCAACAGAGCTACAGAAAATCTGTAAAGACCAAGGGACCC     |     |     |     |     |     |
|              | 250                                                            | 260 | 270 | 280 | 290 | 300 |
| 1 HUMAN      | CTCAAACAAAACAGCCAGGCTTTTCTGCCAAAAGATGACTGAGAAGACTGTTAAAGCA     |     |     |     |     | 300 |
| 2 CHIMPANZEE | CTCAAACAAAACAGCCAGGCTTTTCTGCCAAAAGATGACTGAGAAGACTGTTAAAGCA     |     |     |     |     | 300 |
| 3 GORILLA    | CTCAAACAAAACAGCCAGGCTTTTCTGCCAAAAGATGACTGAGAAGACTGTTAAAGCA     |     |     |     |     | 300 |
| 4 COW        | CTCAAACAAAACAGCAACTTCTTACCAAAGATGACTGAGAAGACTGTTAAAGCA         |     |     |     |     | 300 |
| 5 MOUSE      | CTCAAACAAAACAGCCAGGCTTTGACTGGGAAAAGATCACCGAGAAGCTCTACTAAGACA   |     |     |     |     | 291 |
| 6 RAT        | CTCAAACAAAACAGCCAGGCTTTGACTGGGAAAAGATCACCGAGAAGCTCTACTAAGACA   |     |     |     |     | 291 |
| 7Consensus   | CTCAAACAAAACAGCCAGGCTTTTCTGCCAAAAGATGACTGAGAAGACTGTTAAAGCA     |     |     |     |     |     |
|              | 310                                                            | 320 | 330 | 340 | 350 | 360 |
| 1 HUMAN      | AAAAGCTCTGTTCCCTGCTCAGATGATGCTTACAGAAAATAGAAAATTCCTTTCCCTTC    |     |     |     |     | 360 |
| 2 CHIMPANZEE | AAAAGCTCTGTTCCCTGCTCAGATGATGCTTACAGAAAATAGAAAATTCCTTTCCCTTC    |     |     |     |     | 360 |
| 3 GORILLA    | AAAAGCTCTGTTCCCTGCTCAGATGATGCTTACAGAAAATAGAAAATTCCTTTCCCTTC    |     |     |     |     | 360 |
| 4 COW        | AAAAGTTCGGTTCCTGCTCAGATGATGCTTACAGAAAATAGAAAATTCCTTTCCCTTC     |     |     |     |     | 360 |
| 5 MOUSE      | CAAAGTCTGTTCCCTGCTCAGATGATGCTTACAGAAAATAGAAAATTCCTTTCCCTTC     |     |     |     |     | 351 |
| 6 RAT        | CAAAGCTCTGTTCCCTGCTCAGATGATGCTTACAGAAAATAGAAAATTCCTTTCCCTTC    |     |     |     |     | 351 |
| 7Consensus   | AAAAGCTCTGTTCCCTGCTCAGATGATGCTTACAGAAAATAGAAAATTCCTTTCCCTTC    |     |     |     |     |     |
|              | 370                                                            | 380 | 390 | 400 | 410 | 420 |
| 1 HUMAN      | AATCCTCTAGACTTTGAGATTTTGGACCTGCCCTGAGAGCACCAGATTTGGCCACTCCCC   |     |     |     |     | 420 |
| 2 CHIMPANZEE | AATCCTCTAGACTTTGAGATTTTGGACCTGCCCTGAGAGCACCAGATTTGGCCACTCCCC   |     |     |     |     | 420 |
| 3 GORILLA    | AATCCTCTAGACTTTGAGATTTTGGACCTGCCCTGAGAGCACCAGATTTGGCCACTCCCC   |     |     |     |     | 420 |
| 4 COW        | AATCCTTAGACTTTGAGATTTTGGACCTGCCCTGAGAGCACCAGATTTGGCCACTCCCC    |     |     |     |     | 420 |
| 5 MOUSE      | AATCCTCTAGACTTTGAGATTTTGGACCTGCCCTGAGAGCACCAGATTTCTCACTTTCCCC  |     |     |     |     | 411 |
| 6 RAT        | AATCCTCTAGACTTTGAGATTTTGGACCTGCCCTGAGAGCACCAGATTTCTCACTTTCCCC  |     |     |     |     | 411 |
| 7Consensus   | AATCCTCTAGACTTTGAGATTTTGGACCTGCCCTGAGAGCACCAGATTTGGCCACTCCCC   |     |     |     |     |     |
|              | 430                                                            | 440 | 450 | 460 | 470 | 480 |
| 1 HUMAN      | TTGATGGAGTGCCCTCTCATGATCTTGTACGAGGAGAGAGAGCTTGAAAAGCTGTTTCAG   |     |     |     |     | 480 |
| 2 CHIMPANZEE | TTGATGGAGTGCCCTCTCATGATCTTGTACGAGGAGAGAGAGCTTGAAAAGCTGTTTCAG   |     |     |     |     | 480 |
| 3 GORILLA    | TTGATGGAGTGCCCTCTCATGATCTTGTACGAGGAGAGAGAGCTTGAAAAGCTGTTTCAG   |     |     |     |     | 480 |
| 4 COW        | TTGATGGAGTGCCCTCTCATGATCTTGTATGAGGAGAGAGAGCTTGAGCAGCTGTTACAC   |     |     |     |     | 480 |
| 5 MOUSE      | TTGATGGGCTGCCCTCTCATGATCTTGAATGAAAGAGAGAGGGGCTTGAGAAGCTGCTGCAT |     |     |     |     | 471 |
| 6 RAT        | TTGATGGAGTGCCCTCTCATGATCTTGAATGAAAGAGAGAGGGGCTTGAGAAGCTGCTGCAC |     |     |     |     | 471 |
| 7Consensus   | TTGATGGAGTGCCCTCTCATGATCTTGTACGAGGAGAGAGAGCTTGAAAAGCTGTTTCAG   |     |     |     |     |     |
|              | 490                                                            | 500 | 510 | 520 | 530 | 540 |
| 1 HUMAN      | TTGGCCCCCTTCACTGTGAAGATGCCCTTCCACCATGGGAATCCAAATCTGTTGCAG      |     |     |     |     | 540 |
| 2 CHIMPANZEE | TTGGCCCCCTTCACTGTGAAGATGCCCTTCCACCATGGGAATCCAAATCTGTTGCAG      |     |     |     |     | 540 |
| 3 GORILLA    | TTGGCCCCCTTCACTGTGAAGATGCCCTTCCACCATGGGAATCCAAATCTGTTGCAG      |     |     |     |     | 540 |
| 4 COW        | TTGGCCCCCTTTCGCCCTGTGAAGATGCCCTTCTGCTGTGGGATCTAAATCTGTTGCAG    |     |     |     |     | 540 |
| 5 MOUSE      | TTGGCCCCCTTAGCCCTGTGAAGACCCCTTCTATCATGGGAATCTGTGTAAG-----      |     |     |     |     | 525 |
| 6 RAT        | TTGGCCCCCTTTCGCCCTGTGAGAAAGCCCTTCTACCGTGGGAATCTGATGCTGTGCC     |     |     |     |     | 531 |
| 7Consensus   | TTGGCCCCCTTCACTGTGAAGATGCCCTTCCACCATGGGAATCCAAATCTGTTGCAG      |     |     |     |     |     |
|              | 550                                                            | 560 | 570 | 580 | 590 | 600 |
| 1 HUMAN      | TCTCCTTCAAGCATTCTGTGCAACCTGGATGTTGAATGGCCACTGTTTGTCTGTACATA    |     |     |     |     | 600 |
| 2 CHIMPANZEE | TCTCCTTCAAGCATTCTGTGCAACCTGGATGTTGAATGGCCACTGTTTGTCTGTACATA    |     |     |     |     | 600 |
| 3 GORILLA    | TCTCCTTCAAGCATTCTGTGCAACCTGGATGTTGAATGGCCACTGTTTGTCTGTACATA    |     |     |     |     | 600 |
| 4 COW        | TCTCCTTCAAGCATTCTGTGCAACCTGCTGATGTTGAATGGCCACTGTTTGTCTGTACTTA  |     |     |     |     | 600 |
| 5 MOUSE      | -----GGAG-----TCCGTC--AAACTGGGCTGTAAAGCAACTTGTGCAC-ATGA-       |     |     |     |     | 567 |
| 6 RAT        | TCTCCTTCCAGCGCCCTCTCCGCTCTGGATGTTGAATGGCCACTGTTTGTCTGTACATA    |     |     |     |     | 591 |
| 7Consensus   | TCTCCTTCAAGCATTCTGTGCAACCTGGATGTTGAATGGCCACTGTTTGTCTGTACATA    |     |     |     |     |     |
|              | 610                                                            | 620 | 630 | 640 | 650 | 660 |
| 1 HUMAN      | GATATTTAA                                                      |     |     |     |     |     |
| 2 CHIMPANZEE | GATATTTAA                                                      |     |     |     |     |     |
| 3 GORILLA    | GATATTTAA                                                      |     |     |     |     |     |
| 4 COW        | GATATTTAA                                                      |     |     |     |     |     |
| 5 MOUSE      | -----                                                          |     |     |     |     |     |
| 6 RAT        | GATATTTAA                                                      |     |     |     |     |     |
| 7Consensus   | GATATTTAA                                                      |     |     |     |     |     |
